# Supplementary material
Source: Frontiers journal article supplement (https://www.frontiersin.org/articles/460701)
Supplement: Table_2.DOCX [file Table_2.DOCX]

| Medicinal herbs | Compounds | MW | Structure | Composition | CAS No. | Pharmacological activities | References |
| --- | --- | --- | --- | --- | --- | --- | --- |
| *Fuzi*  *(Aconitum carmichaelii Debeaux)* | Higenamine | 271.32 |  | C16H17NO3 | 5843-65-2 | anti-inflammatory;  anti-oxidative;  anti-apoptotic | Wei et al., 2015; Liu et al., 2015;  Zhang et al., 2014 |
| Coryneine chloride | 203.67 |  | C9H14ClNO2 | 1477-68-5 | cardiac-stimulating | Li et al., 2010 |
| Salsolinol | 179.22 |  | C10H13NO3 | 27740-96-1 | cardiac-stimulating | Chen et al., 1982;  Yang et al., 2014 |
| *RouGui*  *(Cinnamomum cassia (L.) J.Presl)* | o-Anisaldehyde | 162.19 |  | C10H10O2 | 1504-74-1 | improve blood supply of cardiac muscle;  anti-shock | Chang et al., 2013 Ma et al., 2018  Hasegawa et al., 2002 |
| Cinnamic acid | 148.16 |  | C9H8O2 | 621-82-9 | protect myocardial function | Li et al., 2019 |
| *Dihuang*  *(Rehmannia glutinosa (Gaertn.) DC.)* | Catalpol | 362.33 |  | C15H22O10 | 2415-24-9 | hypoglycemic effect;  anti-tumor;  anti-inflammatory | Youn et al., 2018;  Yuan et al., 2018 |
| Acteoside | 624.59 |  | C29H36O15 | 61276-17-3 | neuroprotective effect;  antioxidant effect;  immunomodulatory effect | Huang et al., 2012; Deng et al., 2016 |
| *Shanzhuyu*  *(Cornus officinalis Siebold & Zucc.)* | Morroniside | 406.38 |  | C17H26O11 | 25406-64-8 | neuroprotective effect;  antioxidant effect | Wang et al., 2010; Huang et al., 2018 |
| Loganin | 390.38 |  | C17H26O10 | 18524-94-2 | anti-inflammatory;  immunomodulatory effect | Wang et al., 2018  He et al., 2016 |
| *Shanyao*  *(Dioscorea oppositifolia L.)* | Diosgenin | 414.63 |  | C27H42O3 | 512-04-9 | anti-tumor;  anti-inflammatory;  antioxidant effect | Guo et al., 2016;  Yan et al., 2013 |
| *Fuling*  *(Poria cocos(Schw.)Wolf)* | Pachymic acid | 528.76 |  | C33H52O5 | 29070-92-6 | anti-tumor;  anti-inflammatory;  antioxidant effect;  hypoglycemic effect | Qian et al., 2018;  Li et al., 2017 |
| *Danpi*  *(Paeonia × suffruticosa Andrews)* | Acetophenone | 166.18 |  | C9H10O3 | 552-41-0 | anti-inflammatory;  anti-allergy;  neuroprotective effect;  anti-tumor | Tanaka et al., 2016;  Sun et al., 2015 |
| Paeoniflorin | 480.47 |  | C23H28O11 | 23180-57-6 | anti-inflammatory;  antioxidant effect;  antidepressant;  enrich the blood | Zhou et al., 2017;  Wu et al., 2009 |
| *Zexie*  *(Alisma plantago-aquatica L.)* | Alisol A | 490.72 |  | C30H50O5 | 19885-10-0 | diuretic action;  anti-atherosclerosis | Yu et al., 2011  Zhang et al., 2015 |
| Alisol B | 472.70 |  | C30H48O4 | 18649-93-9 | diuretic action; | Gu et al., 2015 |
