# Supplementary material
Source: Frontiers journal article supplement (https://www.frontiersin.org/articles/460701)
Supplement: Table_4.DOCX [file Table_4.DOCX]

| Groups | BUN  (mmol/l) | Scr  (μmol/l) | ACTH  (ng/ml) | CORT  (ng/ml) | U-TP  (mg/24 h) | 17-OHCS  (nmol/l) |
| --- | --- | --- | --- | --- | --- | --- |
| Control | 5.69±0.61 | 53.50±4.18 | 101.11±6.57 | 82.15±8.47 | 28.73±6.51 | 45.31±3.62 |
| Model | 34.37±12.99** | 179.79±47.52** | 87.04±5.07** | 38.75±5.96** | 51.58±8.59** | 32.01±2.40** |
| SQW | 10.41±3.02▲▲ | 67.21±13.82▲▲ | 99.00±3.56▲▲ | 55.51±4.35▲▲ | 27.86±5.81▲▲ | 41.19±3.01▲▲ |
| The values are presented as mean values ± SD. ***p*<0.01 compared with the control group (n=10); ▲▲*p*<0.01 SQW group (n=10) compared with the model group (n=10). | | | | | | |
